# Supplementary material for: Cl-Loss dynamics in the dissociative photoionization of CF3Cl with threshold photoelectron–photoion coincidence imaging
Source: Royal Society of Chemistry journal article supplement (doi:10.1039/c7cp07502b), 2018-01-01
Supplement: c7cp07502b1.pdf [file c7cp07502b1.pdf]

## Supporting Information

# Dissociative Photoionization of $\text{CF}_3\text{Cl}$ with Threshold Photoelectron-photoion Coincidence Velocity Map Imaging

Xiangkun Wu,<sup>1</sup> Guoqiang Tang,<sup>1</sup> Hanhui Zhang,<sup>1</sup> Xiaoguo Zhou,<sup>1,2,†</sup>

Shilin Liu,<sup>1,2</sup> Fuyi Liu,<sup>3</sup> Liusi Sheng,<sup>3</sup> Bing Yan<sup>4</sup>

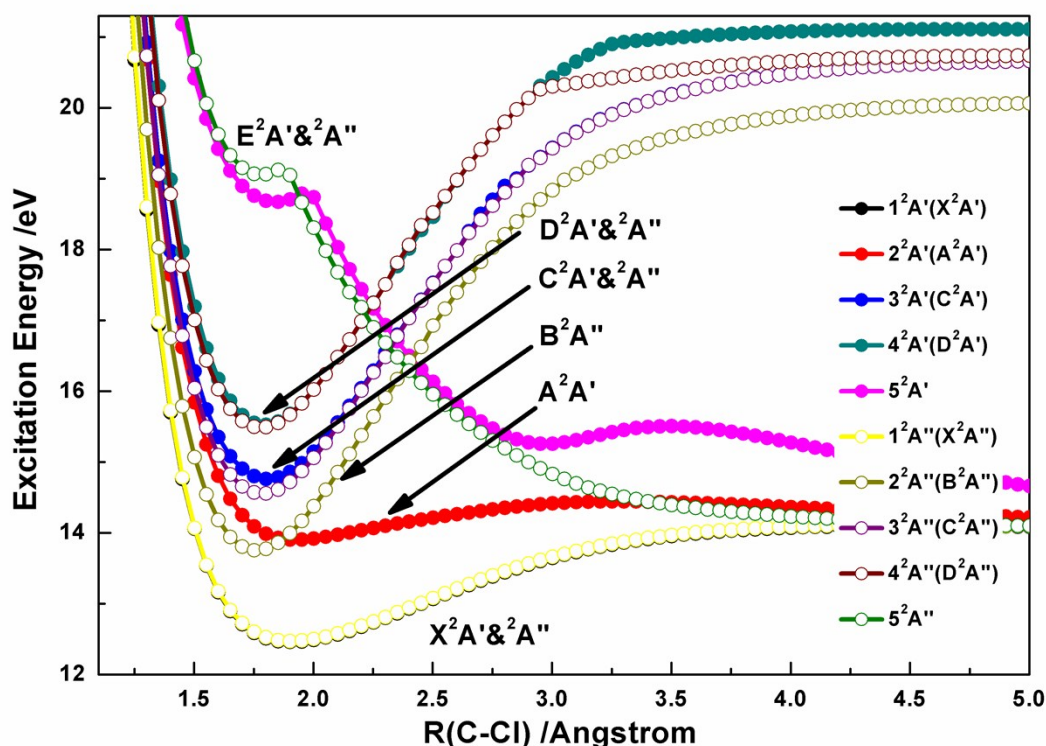

Figure S1. CI-loss potential energy curves of the low-lying electronic states of  $\text{CF}_3\text{Cl}^+$  at TD-B3LYP/6-311+G(d) level, where the geometric parameters are fixed at the optimized values of the neutral molecule.

These potential energy curves show the Franck-Condon region when being ionized. As suggested in Figure S1, the higher electronic states than the  $\text{D}^2\text{E}$  ionic state are repulsive, but the cross points are much higher than the band origin of  $\text{D}^2\text{E}$  state. Thus, the crosses of the higher repulsive electronic states are not taken into account in the present dissociative photoionization mechanism via  $\text{A}^2\text{A}_1$ ,  $\text{B}^2\text{A}_2$ ,  $\text{C}^2\text{E}$  and  $\text{D}^2\text{E}$  ionic states.
